# Supplementary material for: Unraveling the Dynamics of Intellectual Capital, Firm Performance, and the Influential Moderators—BIG4 Auditors and Group Affiliation
Source: MDPI journal article supplement (doi:10.3390/ijfs12010029), 2024-03-20
Supplement: s1 [file s1]

**Table S1.** U and inverted U test.

| Variables     | Slope at Lower Bound | Slope at Upper Bound                       | Turning Point [Data Range] | U Test (t-Value) | Result     |
|---------------|----------------------|--------------------------------------------|----------------------------|------------------|------------|
| MVAIC × MVAIC | 0.0165 ***           | Dependent Variable: Return on Assets (ROA) |                            | 10.83 ***        | Inverted U |
|               |                      | −0.0076 ***                                | 13.2268 [−2.979 20.707]    |                  |            |
| MVAIC × MVAIC | 0.1845 ***           | Dependent Variable: Tobin’s Q (TQ)         |                            | 09.67 ***        | Inverted U |
|               |                      | −0.1134 ***                                | 11.6898 [−2.979 20.707]    |                  |            |

**Note:** We estimate the slope, turning or extreme point, and t-value using STATA’s “utest” command. The symbols \*\*\* indicates the p values at 1%. The measurement and description of variables are presented in Appendix A.

**Table S2.** Simple slope test.

|                                                   | Linear Relationship |           |         |          | Curvilinear Relationship |           |         |           |
|---------------------------------------------------|---------------------|-----------|---------|----------|--------------------------|-----------|---------|-----------|
|                                                   | ROA                 |           | TQ      |          | ROA                      |           | TQ      |           |
|                                                   | Slope               | t-Stat    | Slope   | t-Stat   | Slope                    | t-Stat    | Slope   | t-Stat    |
| Moderation of Group Affiliation                   |                     |           |         |          |                          |           |         |           |
| at Group = 1                                      | 0.00473             | 16.64 *** | 0.05136 | 9.46 *** | 0.00827                  | 20.45 *** | 0.10996 | 12.34 *** |
| at Group = 0                                      | 0.00558             | 17.51 *** | 0.03818 | 7.17 *** | 0.00985                  | 23.64 *** | 0.08138 | 11.38 *** |
| Moderation of BIG4 Auditors                       |                     |           |         |          |                          |           |         |           |
| at BIG4 = 1                                       | 0.00720             | 15.48 *** | 0.08344 | 7.93 *** | 0.01276                  | 19.75 *** | 0.21194 | 14.17 *** |
| at BIG4 = 0                                       | 0.00456             | 18.94 *** | 0.03297 | 8.15 *** | 0.00814                  | 25.20 *** | 0.06198 | 10.68 *** |
| Joint moderating effects                          |                     |           |         |          |                          |           |         |           |
| at Group = 1 and BIG4 =1                          | 0.00751             | 12.05 *** | 0.10395 | 6.86 *** | 0.01242                  | 16.01 *** | 0.22026 | 10.28 *** |
| at Group = 1 and BIG4 =0                          | 0.00384             | 12.61 *** | 0.03456 | 6.70 *** | 0.00682                  | 15.4 ***  | 0.07249 | 8.22 ***  |
| at Group = 0 and BIG4 =1                          | 0.00688             | 10.49 *** | 0.06283 | 4.52 *** | 0.01319                  | 12.91 *** | 0.20419 | 9.76 ***  |
| at Group = 0 and BIG4 =0                          | 0.00521             | 14.89 *** | 0.03115 | 5.50 *** | 0.00909                  | 20.7 ***  | 0.05432 | 7.42 ***  |
| Moderated moderation of BIG4 on Group Affiliation |                     |           |         |          |                          |           |         |           |
| BIG4 Auditors = 1                                 |                     |           |         |          |                          |           |         |           |
| at Group = 1                                      | 0.00751             | 12.05 *** | 0.10395 | 6.86 *** | 0.01242                  | 16.01 *** | 0.22026 | 10.28 *** |
| at Group = 0                                      | 0.00688             | 10.49 *** | 0.06283 | 4.52 *** | 0.01319                  | 12.91 *** | 0.20419 | 9.76 ***  |
| BIG4 Auditors = 0                                 |                     |           |         |          |                          |           |         |           |
| at Group = 1                                      | 0.00384             | 12.61 *** | 0.03456 | 6.70 *** | 0.00682                  | 15.40 *** | 0.07249 | 8.22 ***  |
| at Group = 0                                      | 0.00521             | 14.89 *** | 0.03115 | 5.50 *** | 0.00909                  | 20.70 *** | 0.05432 | 7.42 ***  |

**Note:** The table reports the slope test for checking the moderating effects. The symbols \*\*\*, indicates the statistical significance at 1%. The significance of slope is one of the conditions for moderating effect. The measurement and description of variables are presented in Appendix A.

**Table S3.** Slope difference test.

|                                                      | Linear Relationship |                   |           |                |                   |           | Curvilinear Relationship |                   |           |                |                   |           |
|------------------------------------------------------|---------------------|-------------------|-----------|----------------|-------------------|-----------|--------------------------|-------------------|-----------|----------------|-------------------|-----------|
|                                                      | ROA                 |                   |           | TQ             |                   |           | ROA                      |                   |           | TQ             |                   |           |
|                                                      | $\Delta$ Slope      | SE $\Delta$ Slope | t-Stat    | $\Delta$ Slope | SE $\Delta$ Slope | t-Stat    | $\Delta$ Slope           | SE $\Delta$ Slope | t-Stat    | $\Delta$ Slope | SE $\Delta$ Slope | t-Stat    |
| Moderation of Group Affiliation                      |                     |                   |           |                |                   |           |                          |                   |           |                |                   |           |
| Group = 0 vs. Group = 1                              | 0.00085             | 0.00040           | 2.12 **   | -0.01318       | 0.00712           | -1.85 *   | 0.00157                  | 0.00056           | 2.82 ***  | -0.02858       | 0.01111           | -2.57 **  |
| Moderation of BIG4 Auditors                          |                     |                   |           |                |                   |           |                          |                   |           |                |                   |           |
| BIG4 = 0 vs. BIG4 = 1                                | -0.00263            | 0.00050           | -5.29 *** | -0.05047       | 0.01090           | -4.63 *** | -0.00462                 | 0.00070           | -6.62 *** | -0.14996       | 0.01578           | -9.50 *** |
| Joint moderating effects                             |                     |                   |           |                |                   |           |                          |                   |           |                |                   |           |
| (Group = 1 & BIG4 = 0) vs.<br>(Group = 1 & BIG4 = 1) | -0.00366            | 0.00067           | -5.43 *** | -0.06940       | 0.01562           | -4.44 *** | -0.00559                 | 0.00087           | -6.42 *** | -0.14777       | 0.02283           | -6.47 *** |
| (Group = 0 & BIG4 = 1) vs.<br>(Group = 1 & BIG4 = 1) | -0.00062            | 0.00088           | -0.71     | -0.04112       | 0.02021           | -2.04 **  | 0.00077                  | 0.00126           | 0.61      | -0.01607       | 0.03000           | -0.54     |
| (Group = 0 & BIG4 = 0) vs.<br>(Group = 1 & BIG4 = 1) | -0.00229            | 0.00070           | -3.28 *** | -0.07281       | 0.01596           | -4.56 *** | -0.00333                 | 0.00088           | -3.79 *** | -0.16594       | 0.02245           | -7.39 *** |
| (Group = 0 & BIG4 = 1) vs.<br>(Group = 1 & BIG4 = 0) | 0.00304             | 0.00070           | 4.31 ***  | 0.02827        | 0.01448           | 1.95 **   | 0.00636                  | 0.00110           | 5.79 ***  | 0.13170        | 0.02249           | 5.86 ***  |
| (Group = 0 & BIG4 = 0) vs.<br>(Group = 1 & BIG4 = 0) | 0.00137             | 0.00045           | 3.08 ***  | -0.00341       | 0.00723           | -0.47     | 0.00227                  | 0.00061           | 3.73 ***  | -0.01817       | 0.01110           | -1.64 *   |
| (Group = 0 & BIG4 = 0) vs.<br>(Group = 0 & BIG4 = 1) | -0.00167            | 0.00072           | -2.32 **  | -0.03168       | 0.01484           | -2.13 **  | -0.00410                 | 0.00109           | -3.75 *** | -0.14987       | 0.02211           | -6.78 *** |
| Moderated moderation of BIG4 on Group Affiliation    |                     |                   |           |                |                   |           |                          |                   |           |                |                   |           |
| Group Affiliation = 1                                |                     |                   |           |                |                   |           |                          |                   |           |                |                   |           |
| BIG4 = 1 vs. BIG4 = 0                                | 0.00366             | 0.00067           | 5.43 ***  | 0.06940        | 0.01562           | 4.44 ***  | 0.00559                  | 0.00087           | 6.42 ***  | 0.14777        | 0.02283           | 6.47 ***  |
| Group Affiliation = 0                                |                     |                   |           |                |                   |           |                          |                   |           |                |                   |           |
| BIG4 = 1 vs. BIG4 = 0                                | 0.00167             | 0.00072           | 2.32 **   | 0.03168        | 0.01484           | 2.13 **   | 0.00410                  | 0.00109           | 3.75 ***  | 0.14987        | 0.02211           | 6.78 ***  |

**Note:** The table reports the slope difference test, the additional condition for moderating effects. The statistical significance of t-stat indicates the moderating effects and is calculated as the ratio of  $\Delta$ Slope and SE $\Delta$ Slope. The symbols \*\*\*, \*\*, and \* indicate the statistical significance at 1%, 5%, and 10%, respectively. The measurement and description of variables are presented in Appendix A.
